# Supplementary material for: Stress dynamically regulates co-expression networks of glucocorticoid receptor-dependent MDD and SCZ risk genes
Source: PubMed Central journal article supplement (PMC6351530; doi:10.1038/s41398-019-0373-1), 2019-01-29

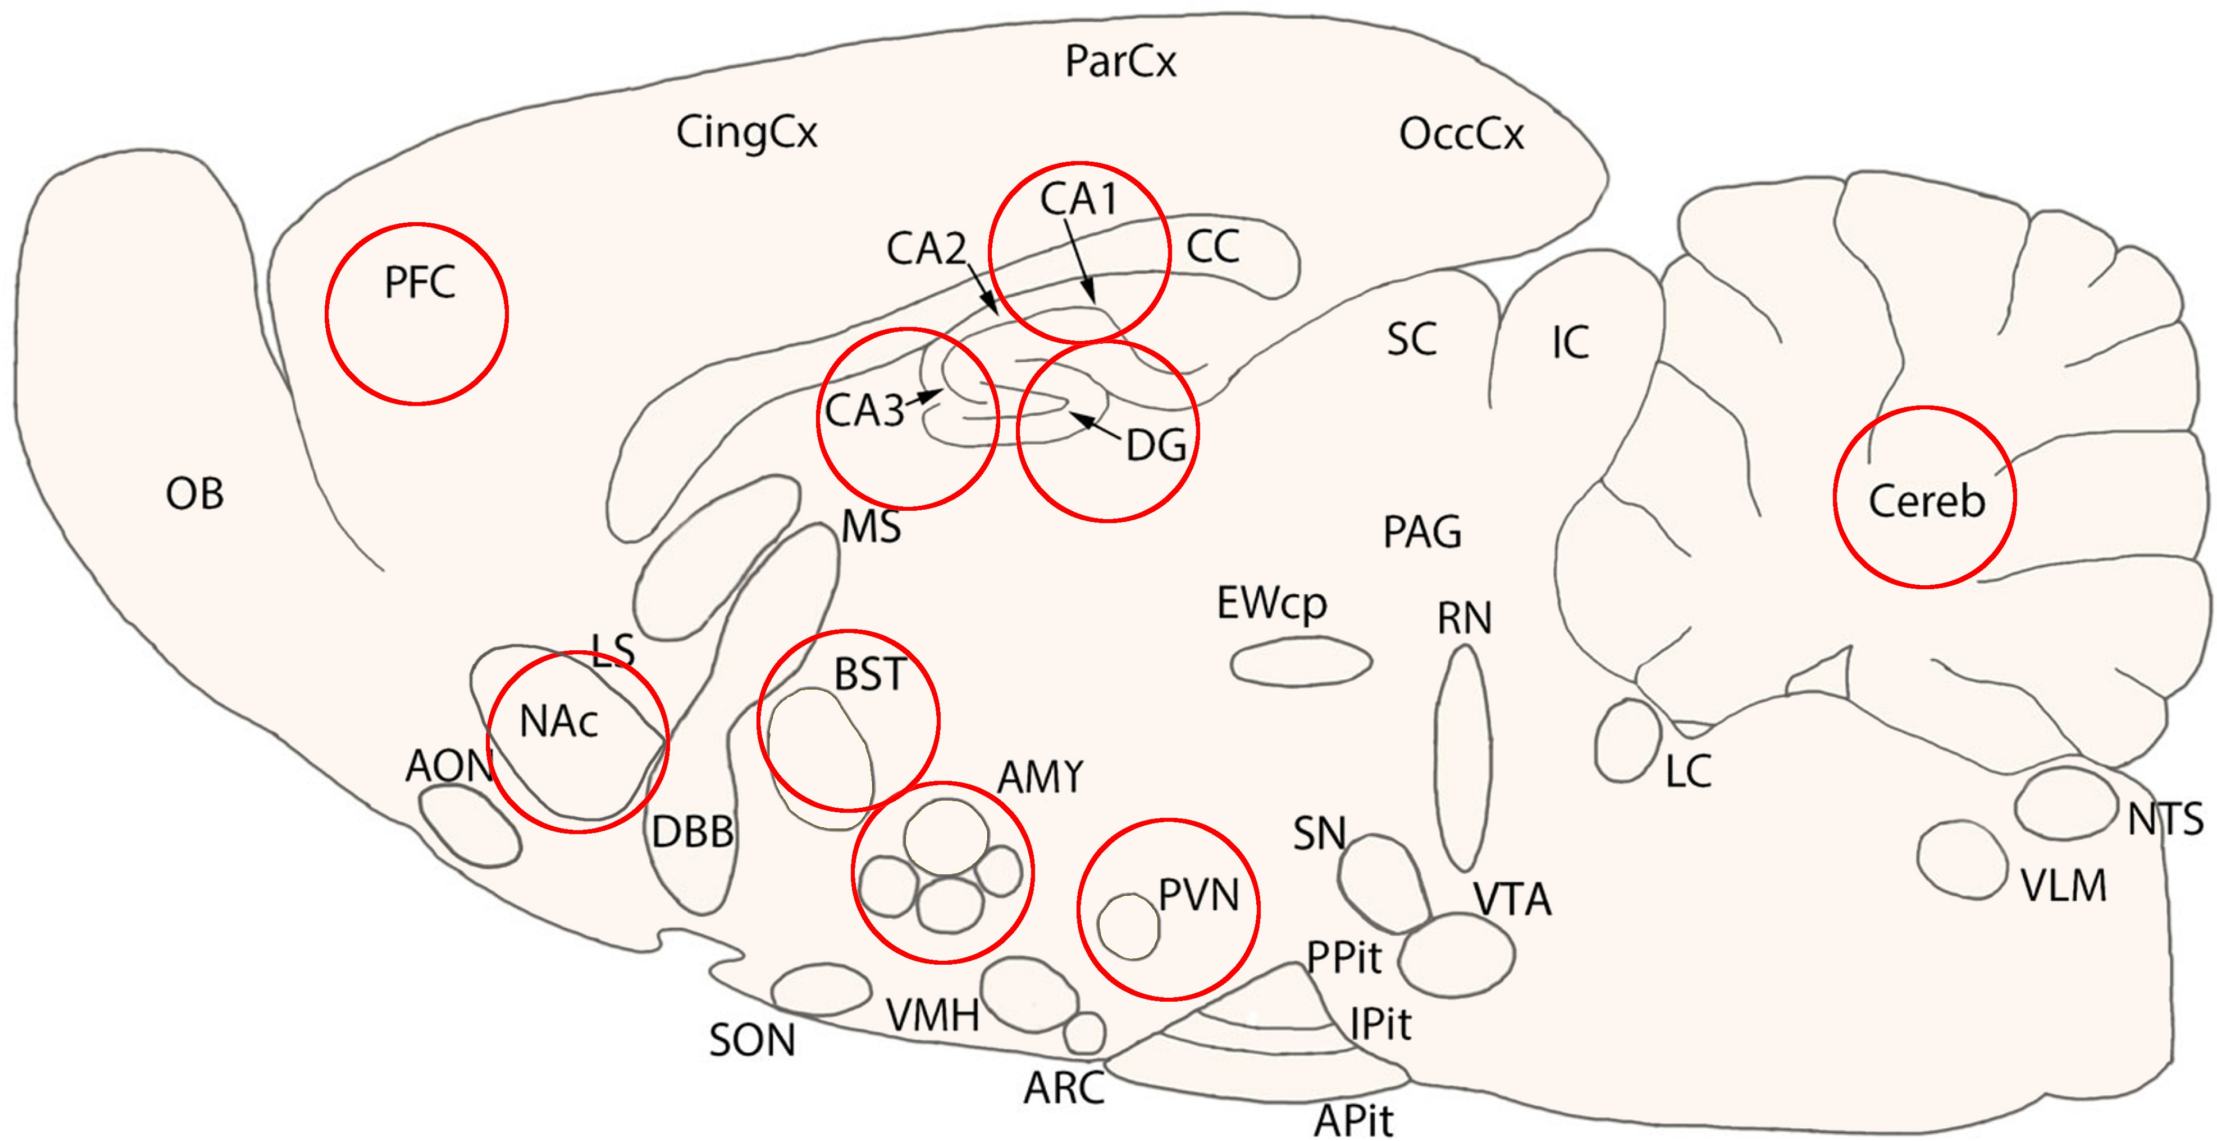

Supplement: 41398_2019_373_MOESM2_ESM.pdf [file 41398_2019_373_MOESM2_ESM.pdf]
