# Supplementary material for: Stress dynamically regulates co-expression networks of glucocorticoid receptor-dependent MDD and SCZ risk genes
Source: PubMed Central journal article supplement (PMC6351530; doi:10.1038/s41398-019-0373-1), 2019-01-29
Supplement: 41398_2019_373_MOESM7_ESM.pdf [file 41398_2019_373_MOESM7_ESM.pdf]

**Suppl. Table 4**

| GO Term                                                         | cellualr component 2017b | Overlap       | Adjusted P-value            | Genes |
|-----------------------------------------------------------------|--------------------------|---------------|-----------------------------|-------|
| <b>cytoplasmic side of late endosome membrane (GO:0098560)</b>  | 3/39                     | <b>0,0226</b> | HLA-DRB5;HLA-DRB4;ANXA2     |       |
| <b>luminal side of late endosome membrane (GO:0098551)</b>      | 3/36                     | <b>0,0226</b> | HLA-DRB5;HLA-DRB4;ANXA2     |       |
| <b>multivesicular body membrane (GO:0032585)</b>                | 3/53                     | <b>0,0375</b> | HLA-DRB5;HLA-DRB4;ANXA2     |       |
| lysosomal HOPS complex (GO:1902501)                             | 4/222                    | 0,0765        | HLA-DRB5;HLA-DRB4;ANXA2;GBA |       |
| integral component of lysosomal membrane (GO:1905103)           | 4/223                    | 0,0765        | HLA-DRB5;HLA-DRB4;ANXA2;GBA |       |
| extrinsic component of lysosome membrane (GO:0032419)           | 4/222                    | 0,0765        | HLA-DRB5;HLA-DRB4;ANXA2;GBA |       |
| cytoplasmic side of lysosomal membrane (GO:0098574)             | 4/226                    | 0,0765        | HLA-DRB5;HLA-DRB4;ANXA2;GBA |       |
| lysosomal proton-transporting V-type ATPase complex (GO:004226) | 4/226                    | 0,0765        | HLA-DRB5;HLA-DRB4;ANXA2;GBA |       |
| cytolytic granule membrane (GO:0101004)                         | 4/226                    | 0,0765        | HLA-DRB5;HLA-DRB4;ANXA2;GBA |       |
| endolysosome membrane (GO:0036020)                              | 4/233                    | 0,0765        | HLA-DRB5;HLA-DRB4;ANXA2;GBA |       |
| phagolysosome membrane (GO:0061474)                             | 4/257                    | 0,1006        | HLA-DRB5;HLA-DRB4;ANXA2;GBA |       |
| azurophil granule membrane (GO:0035577)                         | 4/273                    | 0,1094        | HLA-DRB5;HLA-DRB4;ANXA2;GBA |       |

**Suppl. Table 5**

| Wikipathway 2016                                         | Overlap | Adjusted P-value | Genes              |
|----------------------------------------------------------|---------|------------------|--------------------|
| <b>Cytoplasmic Ribosomal Proteins_Mus musculus_WP163</b> | 3/70    | <b>0,0478</b>    | RPS25;RPS2;RPS12   |
| <b>Cytoplasmic Ribosomal Proteins_Homo sapiens_WP477</b> | 3/89    | <b>0,0478</b>    | RPS25;RPS2;RPS12   |
| <b>Inflammatory Response Pathway_Mus musculus_WP458</b>  | 2/30    | <b>0,0478</b>    | ZAP70;THBS1        |
| <b>Inflammatory Response Pathway_Homo sapiens_WP453</b>  | 2/30    | <b>0,0478</b>    | ZAP70;THBS1        |
| Purine metabolism_Mus musculus_WP2185                    | 3/158   | 0,1217           | IMPDH2;POLR2I;GART |
| TGF-beta Signaling Pathway_Homo sapiens_WP366            | 2/132   | 0,2550           | STAMBPL1;THBS1     |
